# Supplementary material for: MiR-18a-5p Targets Connective Tissue Growth Factor Expression and Inhibits Transforming Growth Factor β2-Induced Trabecular Meshwork Cell Contractility
Source: MDPI journal article supplement (doi:10.3390/genes13081500), 2022-08-22
Supplement: s1 [file s1]

**Table S1** Demographic information of human donor rims

| Donor | Age | Sex    |
|-------|-----|--------|
| 1     | 57  | Male   |
| 2     | 65  | Male   |
| 3     | 64  | Male   |
| 4     | 21  | Male   |
| 5     | 88  | Female |
| 6     | 46  | Female |
| 7     | 77  | Male   |
| 8     | 43  | Female |
| 9     | 52  | Male   |
| 10    | 83  | Female |
| 11    | 68  | Male   |
