# Supplementary material for: MiR-18a-5p Targets Connective Tissue Growth Factor Expression and Inhibits Transforming Growth Factor β2-Induced Trabecular Meshwork Cell Contractility
Source: MDPI journal article supplement (doi:10.3390/genes13081500), 2022-08-22
Supplement: s1 [file s1]

**Table S2** miScript primer assay sequences

| <b>miRNA</b>                      | <b>Probe sequence</b>                        |
|-----------------------------------|----------------------------------------------|
| hsa-miR-18a-5p<br>(MIMAT0000072)  | 5'-UAAGGUGCAUCUAGUGCAGAUAG                   |
| hsa-miR-19a-3p<br>(MIMAT0000073)  | 5'-UGUGCAAUUCUAUGCAAACUGA                    |
| hsa-miR-19b-3p<br>(MIMAT0000074)  | 5'-UGUGCAAUCCAUGCAAACUGA                     |
| hsa-miR-26a-5p<br>(MIMAT0000082)  | 5'-UUCAAGUAAUCCAGGAUAGGCU                    |
| hsa-miR-26b-5p<br>(MIMAT0000083)  | 5'-UUCAAGUAAUUCAGGAUAGGU                     |
| hsa-miR-133b (MIMAT0000770)       | 5'-UUUGGUCCCCUUAACCCAGCUA                    |
| hsa-miR-199a-5p<br>(MIMAT0000231) | 5'-CCCAGUGUUCAGACUACCUGUUC                   |
| hsa-miR-199b-5p<br>(MIMAT0000263) | 5'-CCCAGUGUUUAGACUAUCUGUUC                   |
| SNORD 61                          | Unavailable; transcript: NR_002735<br>(73bp) |
| SNORD 68                          | Unavailable; transcript: NR_002450<br>(72bp) |
