# Supplementary material for: MiR-18a-5p Targets Connective Tissue Growth Factor Expression and Inhibits Transforming Growth Factor β2-Induced Trabecular Meshwork Cell Contractility
Source: MDPI journal article supplement (doi:10.3390/genes13081500), 2022-08-22
Supplement: s1 [file s1]

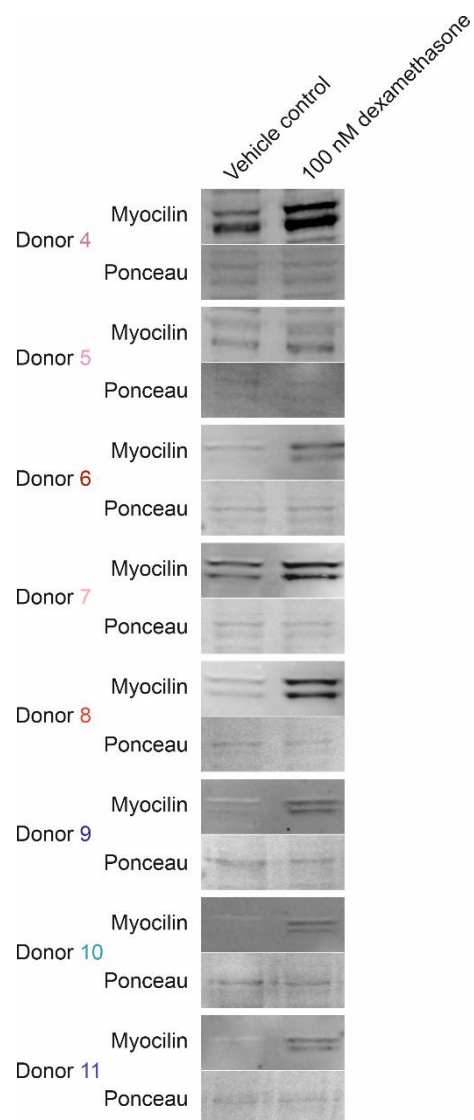

**Figure S2 Characterisation of TM cells from donors 4 to 11 by western blot for myocilin.**

Myocilin expression after 100 nM dexamethasone treatment was measured by western blot. Donors 1, 2 and 3 have been characterised previously<sup>42</sup>.
