# Supplementary material for: MiR-18a-5p Targets Connective Tissue Growth Factor Expression and Inhibits Transforming Growth Factor β2-Induced Trabecular Meshwork Cell Contractility
Source: MDPI journal article supplement (doi:10.3390/genes13081500), 2022-08-22
Supplement: s1 [file s1]

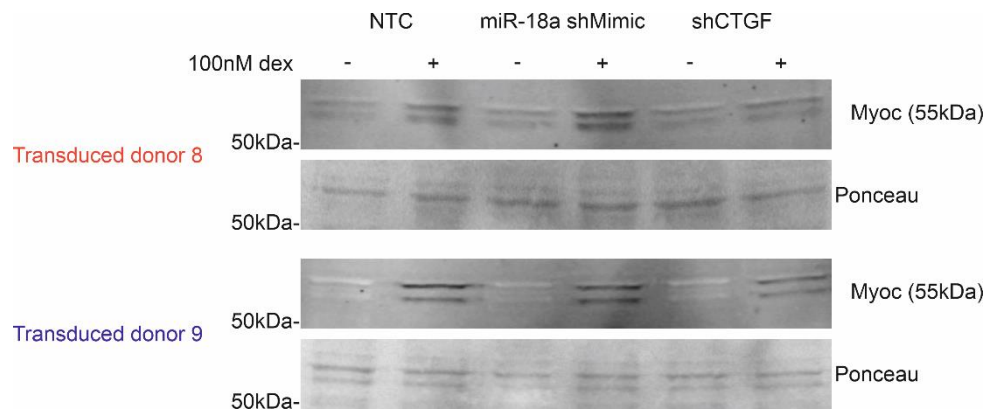

**Figure S5 Lentiviral-transduced TM cells display characteristic upregulation of myocilin by dexamethasone.** Expression of myocilin in lentivirus transduced cell lines, with and without dexamethasone treatment.
