# Supplementary material for: MiR-18a-5p Targets Connective Tissue Growth Factor Expression and Inhibits Transforming Growth Factor β2-Induced Trabecular Meshwork Cell Contractility
Source: MDPI journal article supplement (doi:10.3390/genes13081500), 2022-08-22
Supplement: s1 [file s1]

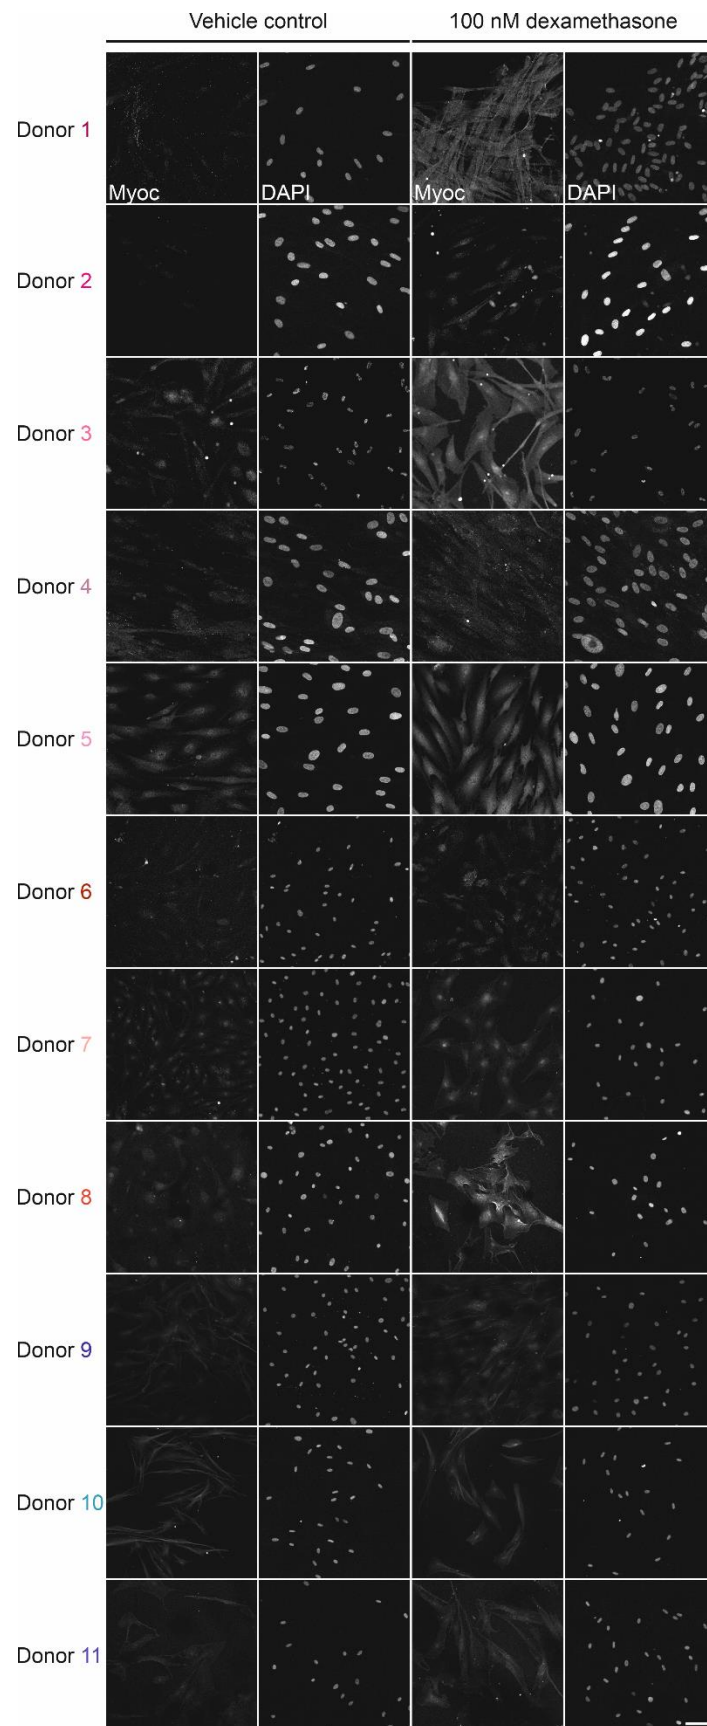

**Figure S1 Characterisation of donor TM cells.** Indirect immunofluorescent staining for myocilin in TM cells treated and untreated with 100 nM dexamethasone. Scale bar = 50  $\mu$ m.
