# Supplementary material for: MiR-18a-5p Targets Connective Tissue Growth Factor Expression and Inhibits Transforming Growth Factor β2-Induced Trabecular Meshwork Cell Contractility
Source: MDPI journal article supplement (doi:10.3390/genes13081500), 2022-08-22
Supplement: s1 [file s1]

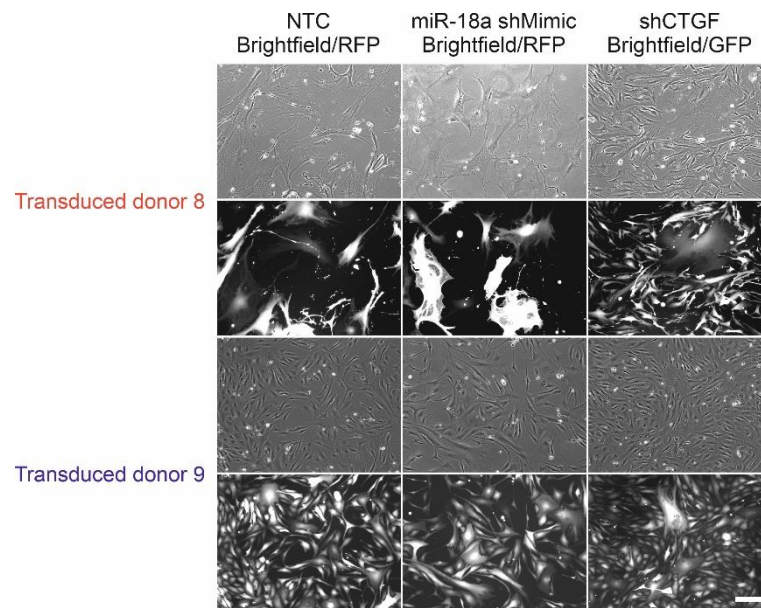

**Figure S4 Validation of lentiviral cell lines.** Live cell brightfield and fluorescence in cells transduced with lentiviruses expressing RFP or GFP. Scale bar = 100 $\mu$ m.
