# Supplementary material for: MiR-18a-5p Targets Connective Tissue Growth Factor Expression and Inhibits Transforming Growth Factor β2-Induced Trabecular Meshwork Cell Contractility
Source: MDPI journal article supplement (doi:10.3390/genes13081500), 2022-08-22
Supplement: s1 [file s1]

**Table S3** Unlabelled gene specific human primers

| Gene  | Sequence                                                                        | Location (exon)    | Amplicon (bp) |
|-------|---------------------------------------------------------------------------------|--------------------|---------------|
| CCN2  | F: 5'-GCTTACCGACTGGAAGACACG<br>R: 5'-CGGATGCACTTTTTGCCCTT                       | Exon 3-4<br>Exon 5 | 233           |
| RPLP0 | F: 5'-<br>GCAGCATCTACAACCCTGAAGTGCTTGA<br>R: 5'-<br>GGTAGCCAATCTGCAGACAGACACTGG | Exon 6<br>Exon 7   | 108           |
| GAPDH | F: 5'-GGAGCGAGATCCCTCCAAAAT<br>R: 5'-GGCTGTTGTCATACTTCTCATGG                    | Exon 4-5<br>Exon 6 | 197           |
