# Supplementary material for: MiR-18a-5p Targets Connective Tissue Growth Factor Expression and Inhibits Transforming Growth Factor β2-Induced Trabecular Meshwork Cell Contractility
Source: Genes (Basel). 2022 Aug 22;13(8):1500. doi: 10.3390/genes13081500 (PMC9408287; doi:10.3390/genes13081500)
Supplement: Supplementary file 1 [file genes-13-01500-s001.zip]

Archive with 10 entries (10 files):
- Figure S1 Characterisation of donor TM cells.pdf
- Figure S2 Characterisation of TM cells from donors 6 to 11 by western blot for myocilin.pdf
- Figure S3 All western blots for CTGF and Lamin A.pdf
- Figure S4 Validation of lentiviral cell lines.pdf
- Figure S5 Lentiviral.pdf
- Figure S6 Original myocilin blot images.pdf
- Figure S7 Original CTGF and Lamin A blot images.pdf
- Table S1 Demographic information of human donor rims.pdf
- Table S2 miScript primer assay sequences.pdf
- Table S3 Unlabelled gene specific human primers.pdf
