# Supplementary figures and images for: MiR-18a-5p Targets Connective Tissue Growth Factor Expression and Inhibits Transforming Growth Factor β2-Induced Trabecular Meshwork Cell Contractility
Source: MDPI journal article supplement (doi:10.3390/genes13081500), 2022-08-22

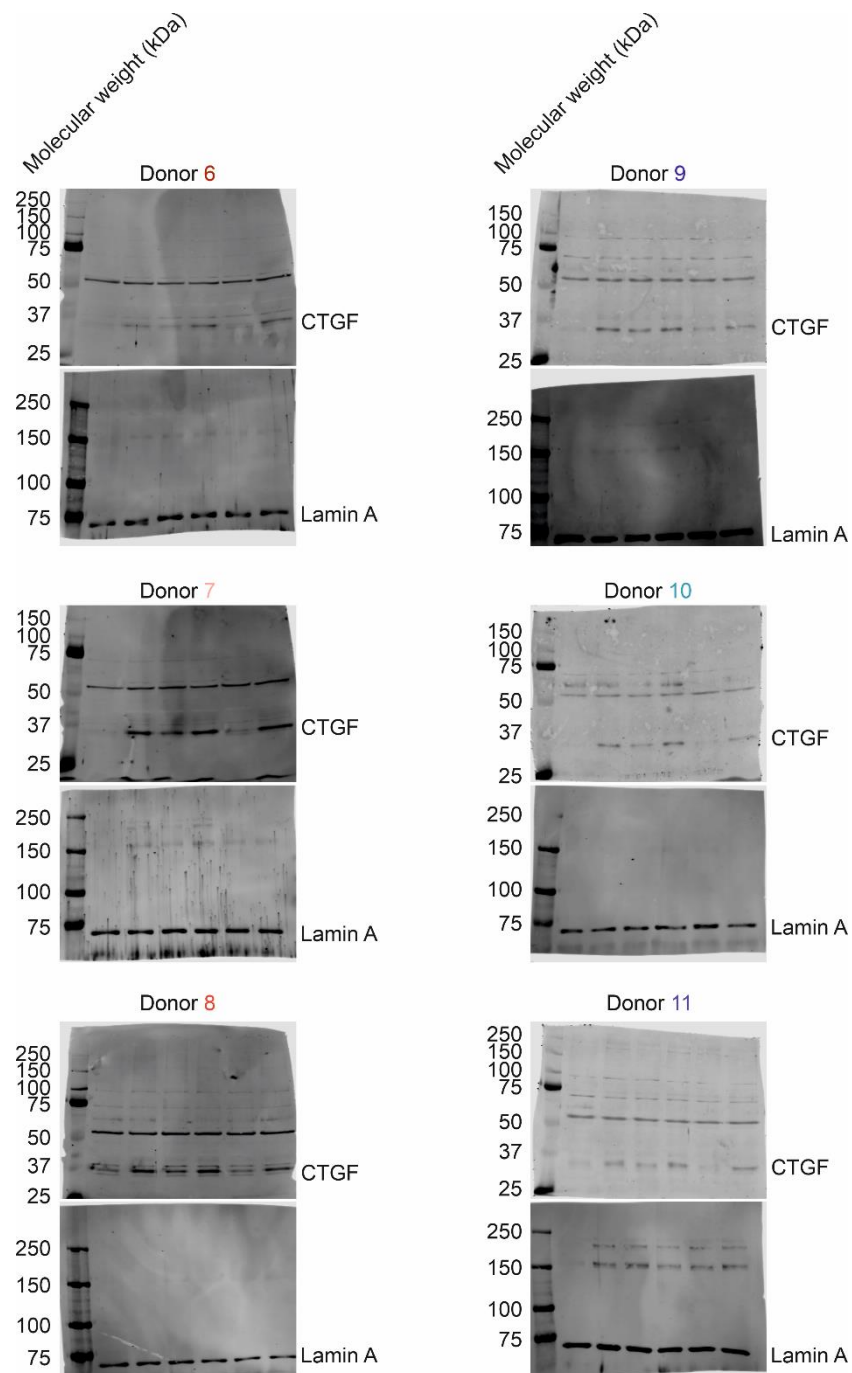

**Figure S7 Original CTGF and Lamin A blot images.**

Supplement: s1 [file s1]

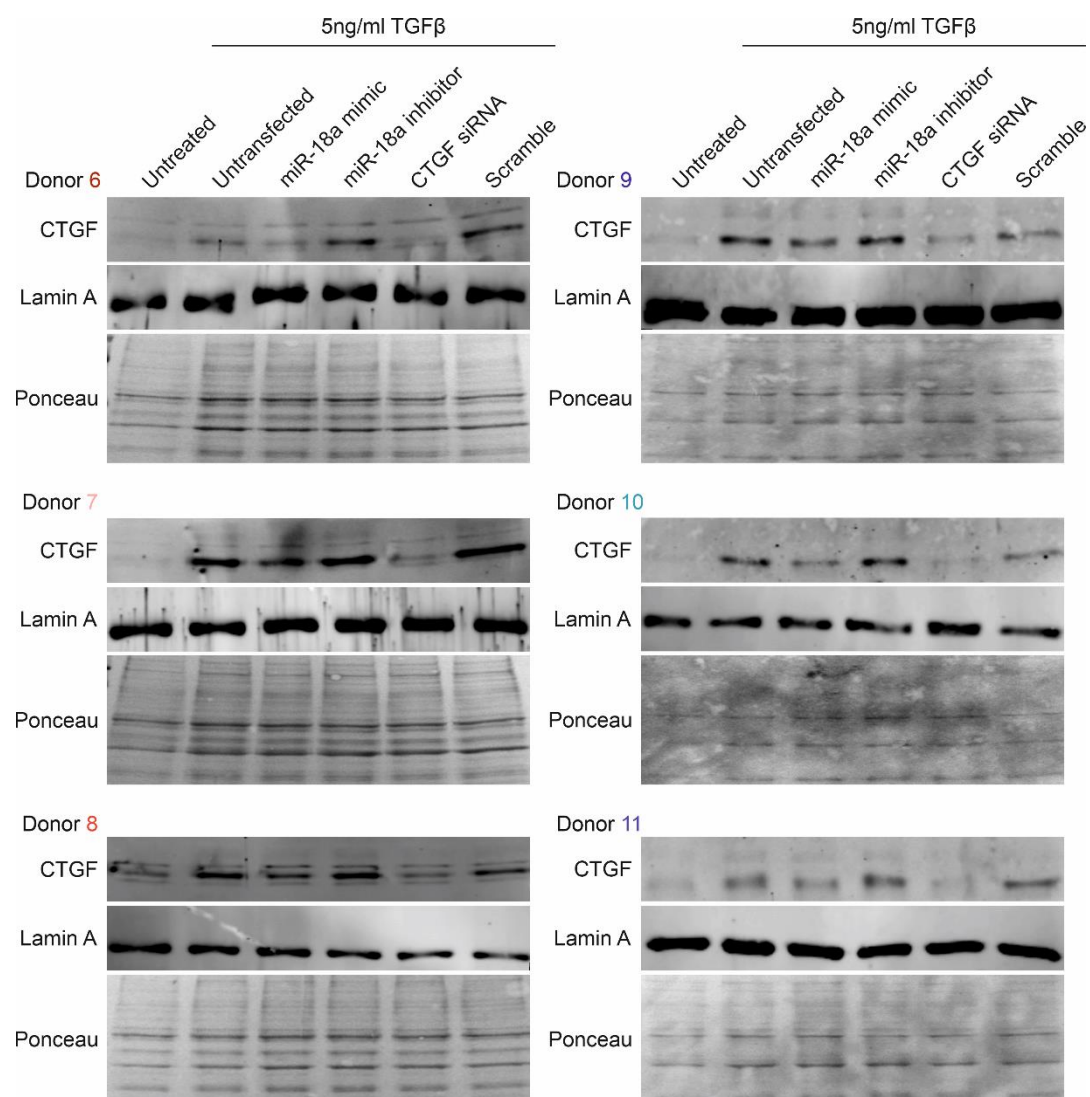

**Figure S3 All western blots for CTGF and Lamin A.**

Supplement: s1 [file s1]

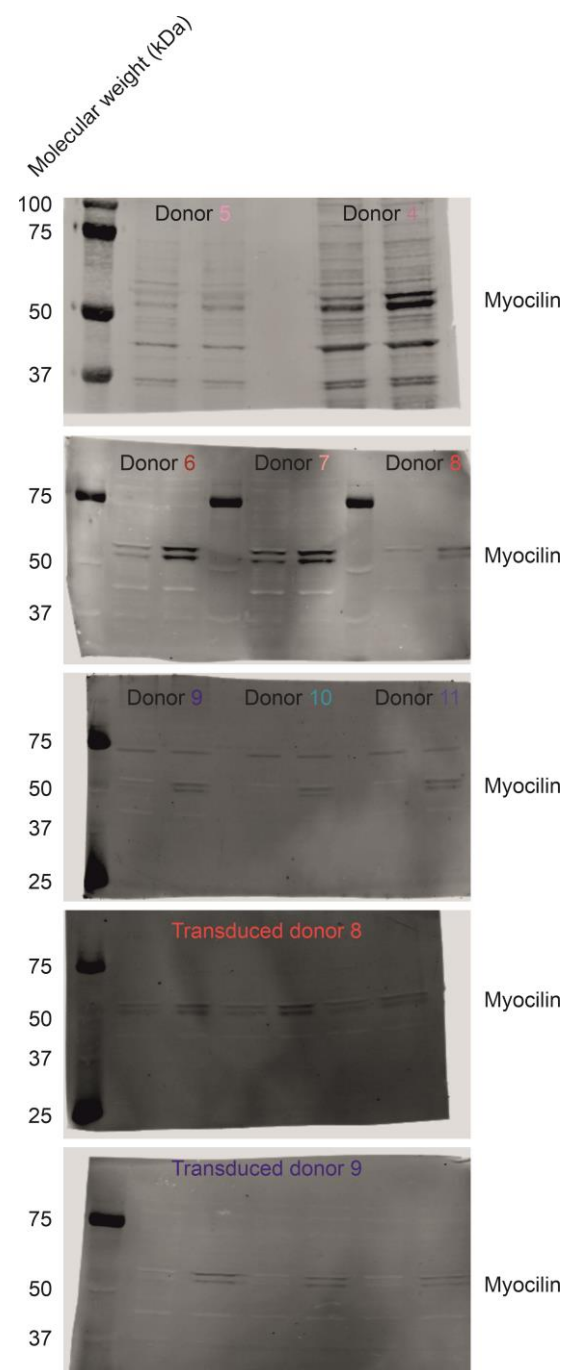

**Figure S6 Original myocilin blot images.**

Supplement: s1 [file s1]
